# Supplementary material
Source: Springer Nature journal article supplement (https://www.springermedizin.de/resource/supplementary/13020_2010_88_MOESM6_ESM.pdf/9640950)

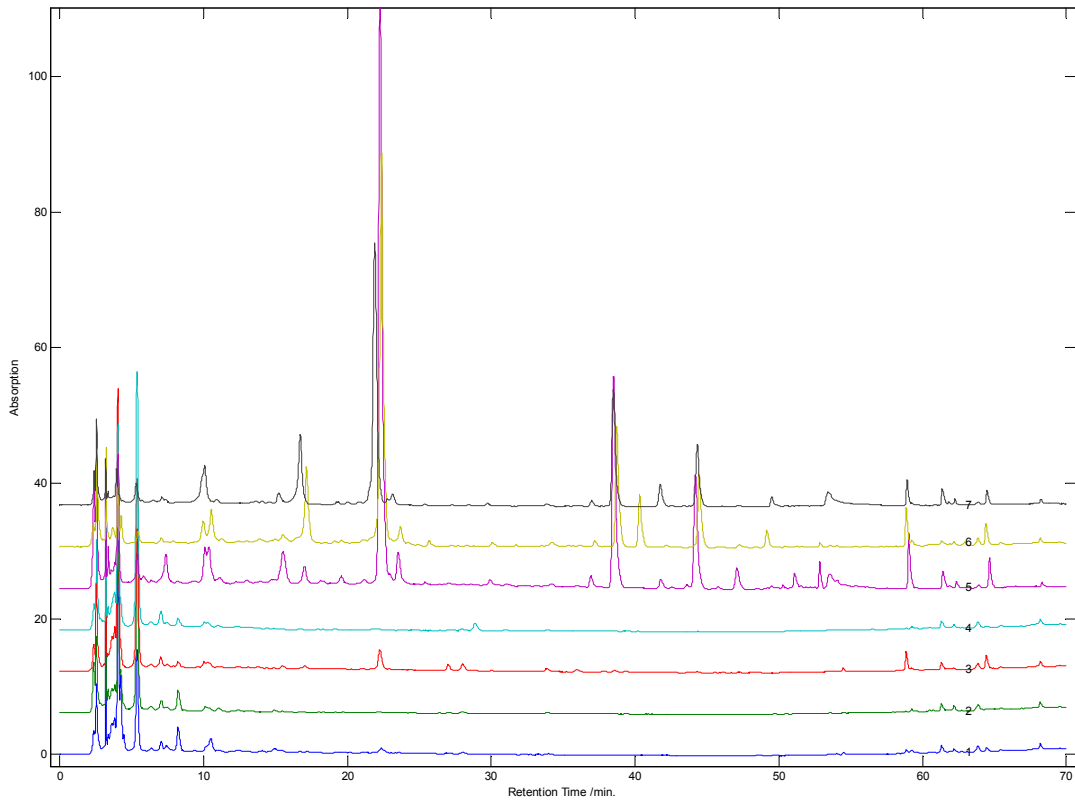

Supplement: MOESM6 [file 9640950]
